# Supplementary material for: Facile synthesis of Ag-doped ZnCdS nanocrystals and transformation into Ag-doped ZnCdSSe nanocrystals with Se treatment
Source: Royal Society of Chemistry journal article supplement (doi:10.1039/c4ra11064a), 2014-11-21
Supplement: c4ra11064a1.pdf [file c4ra11064a1.pdf]

## **Electronic Supplementary Information**

### **Facile Synthesis of Ag-Doped ZnCdS Nanocrystals and Transformation into Ag-Doped ZnCdSSe Nanocrystals with Se- Treating**

Ruosheng Zeng,<sup>\*,a,b</sup> Zhiguo Sun,<sup>a</sup> Sheng Cao,<sup>c</sup> Rongan Shen,<sup>a</sup> Zuoji Liu,<sup>a</sup> Ying Xiong,<sup>a</sup> Jingtao

Long,<sup>a</sup> Jinju Zheng,<sup>c</sup> Yunqiang Zhao,<sup>a</sup> Yayun Shen,<sup>a</sup> and Dingsheng Wang,<sup>b</sup>

<sup>a</sup> Key Lab for Functional Materials Chemistry of Guizhou Province, School of Chemistry and  
Materials Science, Guizhou Normal University, Guiyang 550001, P. R. China

<sup>b</sup> Department of Chemistry, Tsinghua University, Beijing, 100084, P. R. China

<sup>c</sup> Institute of Materials, Ningbo University of Technology, Ningbo 315016, P. R. China

Corresponding author: [zengrsh@gznu.edu.cn](mailto:zengrsh@gznu.edu.cn)

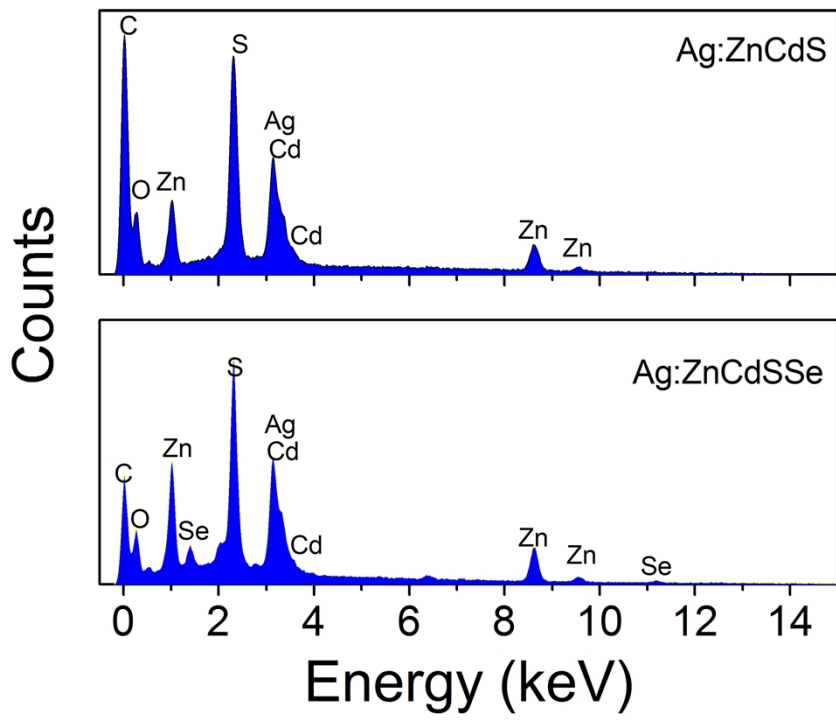

Figure S1. EDS of Ag:ZnCdS and Ag:ZnCdSSe nanocrystals

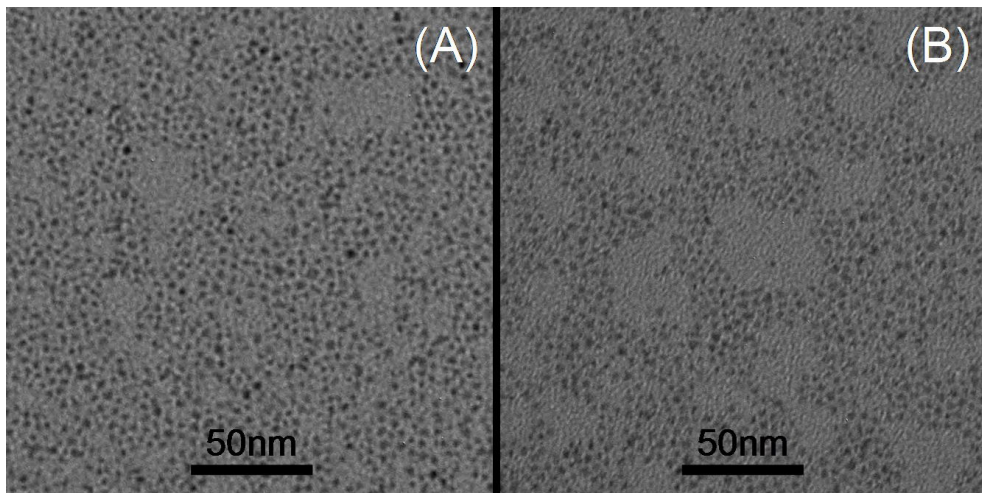

Figure S2. TEM images of Ag:ZnCdS and Ag:ZnCdSSe nanocrystals

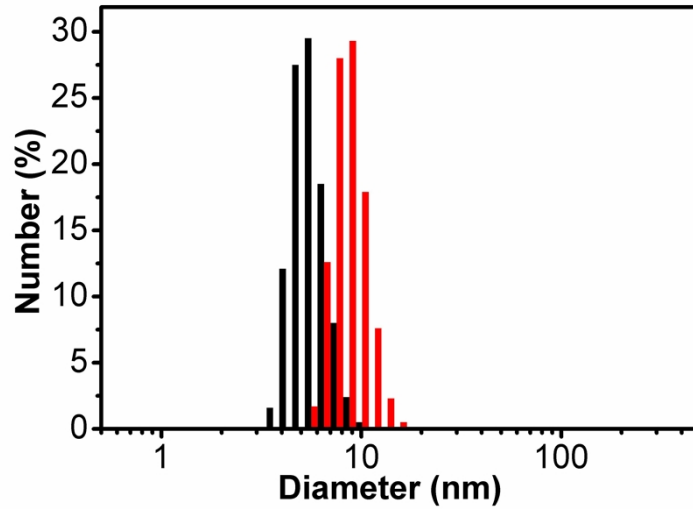

Figure S3. DLS particle size distribution of Ag:ZnCdS (black) and Ag:ZnCdSSe (red) nanocrystals.

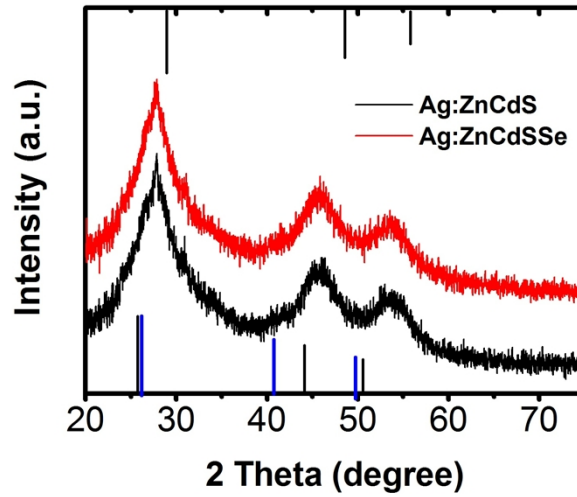

Figure S4. XRD patterns of the Ag:ZnCdS and Ag:ZnCdSSe nanocrystals. The line XRD spectra correspond to bulk (bottom) zinc blende CdS (black) and zinc blende CdSe (blue), and (top) zinc blende ZnS.
